# Supplementary material for: Allosteric binding sites in Rab11 for potential drug candidates
Source: PubMed Central journal article supplement (PMC5991966; doi:10.1371/journal.pone.0198632), 2018-06-06
Supplement: pone.0198632.s066.pdf [file pone.0198632.s066.pdf]

```

.....| .....| .....| .....| .....|
          10      20      30      40      50
Rab1a| MSSMNPEYDY LFKLLIGDS GVGKSCLLR FADDTYESY ISTIGVDFKI
Rab1b| ---MNPEYDY LFKLLIGDS GVGKSCLLR FADDTYESY ISTIGVDFKI
Rab11a| MGTRDDEYDY LFKVVLIGDS GVGKSNLLSR FTRNEFNLES KSTIGVEFAT
Rab11b| MGTRDDEYDY LFKVVLIGDS GVGKSNLLSR FTRNEFNLES KSTIGVEFAT

.....| .....| .....| .....| .....|
          60      70      80      90     100
Rab1a| RTIELDGKTI KLQIWDTAGQ ERFRTITSSY YRGAGIIVW YDVIDQESFN
Rab1b| RTIELDGKTI KLQIWDTAGQ ERFRTITSSY YRGAGIIVW YDVIDQESVA
Rab11a| RSIQVDGKTI KAQIWDTAGQ ERYRAITSAY YRGAVGALLV YDIARKHLTYE
Rab11b| RSIQVDGKTI KAQIWDTAGQ ERYRAITSAY YRGAVGALLV YDIARKHLTYE

.....| .....| .....| .....| .....|
          110     120     130     140     150
Rab1a| NVKQWLQEID RYASENVNKL LVGNKCDLTT KKVVDYTIK EFADSLGIPF
Rab1b| NVKQWLQEID RYASENVNKL LVGNKCDLTT KKVVDNTIATK EFADSLGIPF
Rab11a| NVERWLKELR DHADSNIVIM LVGNKSDLRH LRAVPTDEAR AFAEKNNLSF
Rab11b| NVERWLKELR DHADSNIVIM LVGNKSDLRH LRAVPTDEAR AFAEKNNLSF

.....| .....| .....| .....| .....|
          160     170     180     190     200
Rab1a| LETSAKNATN VEQSFMDAA EIKKRMGPGA TAGGAEK--- ---SNYKIQS
Rab1b| LETSAKNATN VEQAFMDAA EIKKRMGPGA ASGG-ER--- ---PNLKIDS
Rab11a| IETSALDSTN VEAAPQILT EIYRIVSQKQ MSDRRENDMS PSNNVPIHV
Rab11b| IETSALDSTN VEEAFKNILT EIYRIVSQKQ IADRAAHDES PGNNVVDISV

.....| .....|
          210
Rab1a| TP----VQQS GGGCC---
Rab1b| TP----VQPA GGGCC---
Rab11a| PFTTEN--KP KVQCCQNI
Rab11b| PPTTDGQEPN KLQCCQNL

```

**S2.1 Fig. Multiple sequence alignment of Rab1 and Rab11 sequences.** Residues that are conserved in all sequences are highlighted in yellow and residues that are conserved in two or more sequences are highlighted in green.

```

                                G1                                G2
                                10                                20                                30                                40                                50
Rab11a|  MGTRDDEYDY LFKVVLIGDS GVGKSNLLSR FTRNEFNLES KSTIGVEFAT
Rab11b|  MGTRDDEYDY LFKVVLIGDS GVGKSNLLSR FTRNEFNLES KSTIGVEFAT

                                G3
                                60                                70                                80                                90                                100
Rab11a|  RSIQVDGKTI KAQIWDTAGQ ERYRAITSAY YRGAVGALLV YDIAKHLTYE
Rab11b|  RSIQVDGKTI KAQIWDTAGQ ERYRAITSAY YRGAVGALLV YDIAKHLTYE

                                G4
                                110                                120                                130                                140                                150
Rab11a|  NVERWLKELR DHADSN-IVI MLVGNKSDLR HLRVPPTDEA RAFAEKQGLS
Rab11b|  NVERWLKELR DHADSN-IVI MLVGNKSDLR HLRVPPTDEA RAFAEKQGLS

                                G5
                                160                                170                                180                                190                                200
Rab11a|  FIETSAIDST NVEAAFQIIL TEIYRIVSQK QMSDRRENEM SPSNIVVPIH
Rab11b|  FIETSAIDST NVEEAFKQIL TEIYRIVSQK QIADRAHDE SPQIVVVIS

                                210
Rab11a|  VPPTTENKP- -KVQCCQNI
Rab11b|  VPPTTGGQKP NKVQCCQNL

```

**S2.2 Fig. Pairwise sequence alignment of Rab11a and Rab11b.** The G loops are colored in red. The amino acid variations in Rab11b sequence compared to those of Rab11a are highlighted in green.
