# Supplementary material for: Allosteric binding sites in Rab11 for potential drug candidates
Source: PubMed Central journal article supplement (PMC5991966; doi:10.1371/journal.pone.0198632), 2018-06-06
Supplement: pone.0198632.s067.pdf [file pone.0198632.s067.pdf]

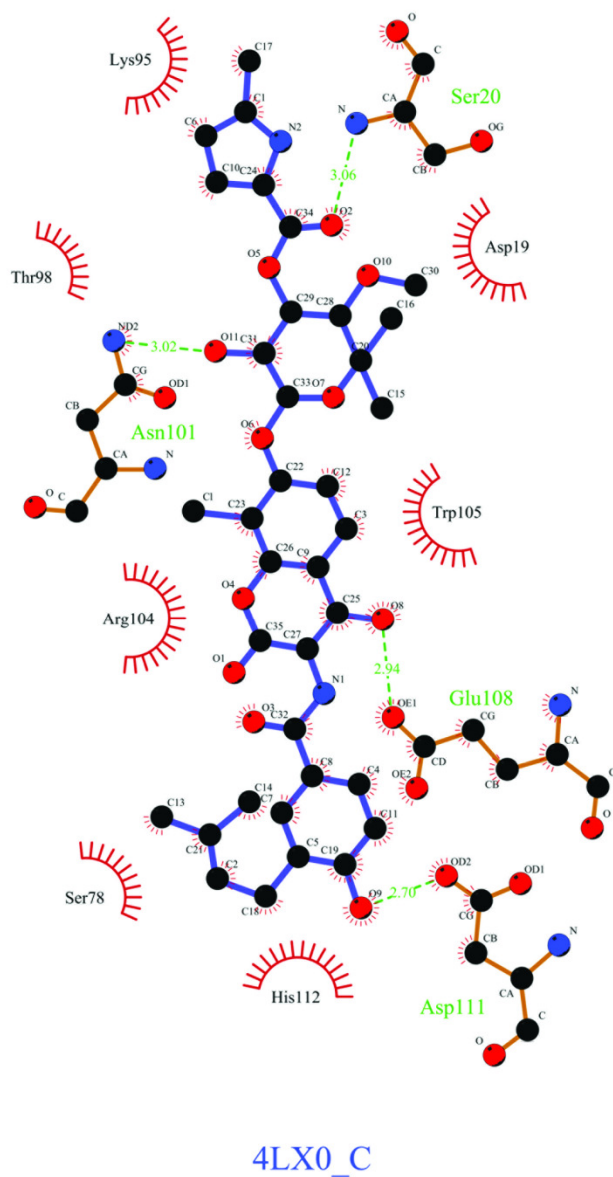

**S3.1 Fig. Ligand ZINC29590259 docked at site 1 of PDB entry 4LX0\_C.** The ligand and Rab11 side chains are shown in ball-and-stick representation. The ligand bonds are colored in purple. Hydrogen bonds are shown as green dotted lines. The Rab11 residues making nonbonded contacts with the ligand are shown as spoked arcs. The figure is generated using LigPlot+.

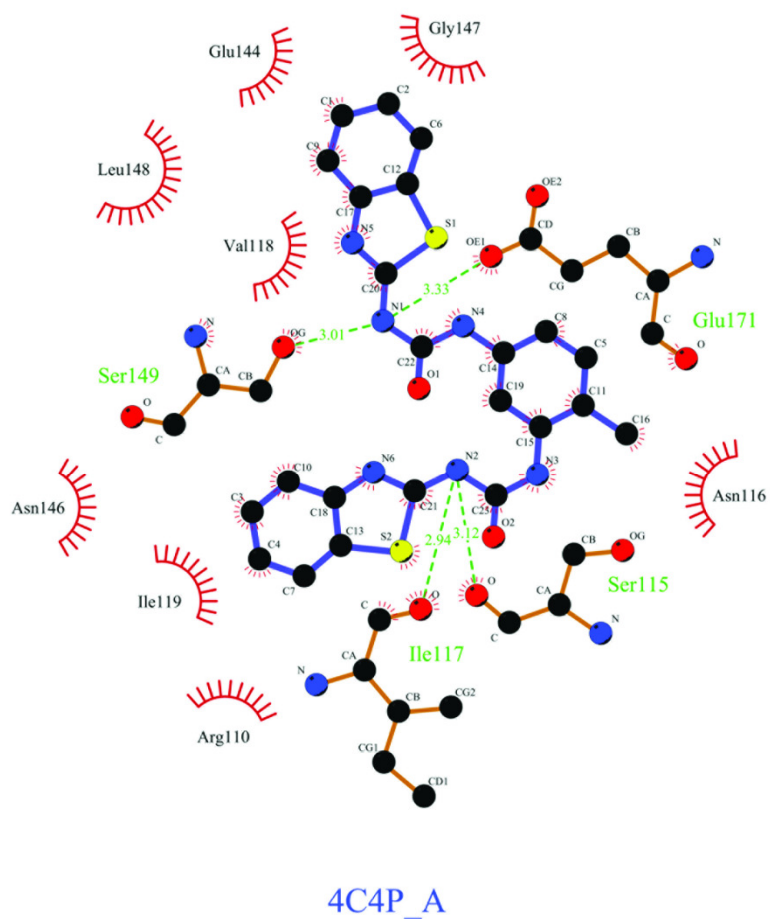

**S3.2. Ligand ZINC01572309 docked at site 2 of PDB entry 4C4P\_A.** The ligand and Rab11 side chains are shown in ball-and-stick representation. The ligand bonds are colored in purple. Hydrogen bonds are shown as green dotted lines. The Rab11 residues making nonbonded contacts with the ligand are shown as spoked arcs. The figure is generated using LigPlot+.

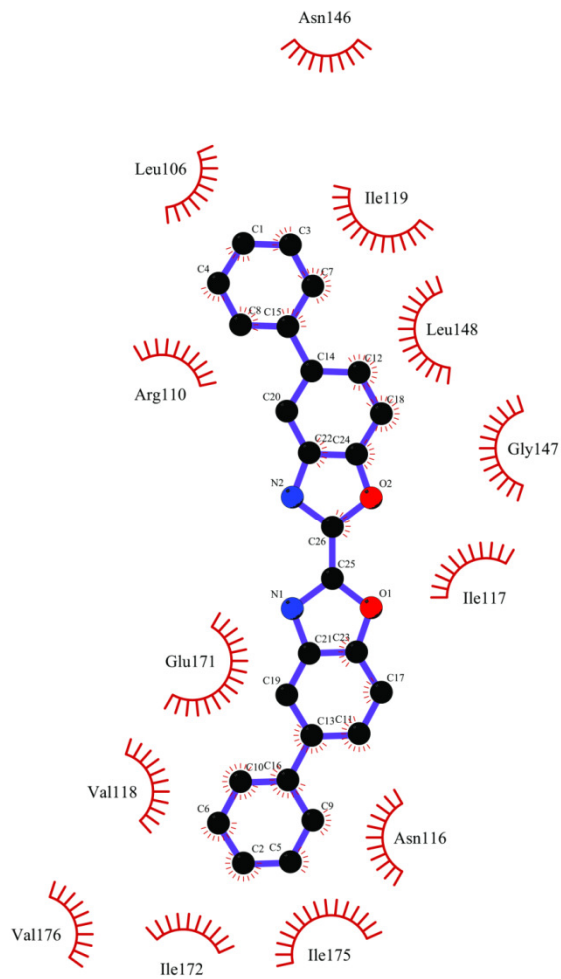

**S3.3. Ligand ZINC13152284 docked at site 2 of PDB entry 4UJ5\_B.** The ligand and Rab11 side chains are shown in ball-and-stick representation. The ligand bonds are colored in purple. Hydrogen bonds are shown as green dotted lines. The Rab11 residues making nonbonded contacts with the ligand are shown as spoked arcs. The figure is generated using LigPlot+.

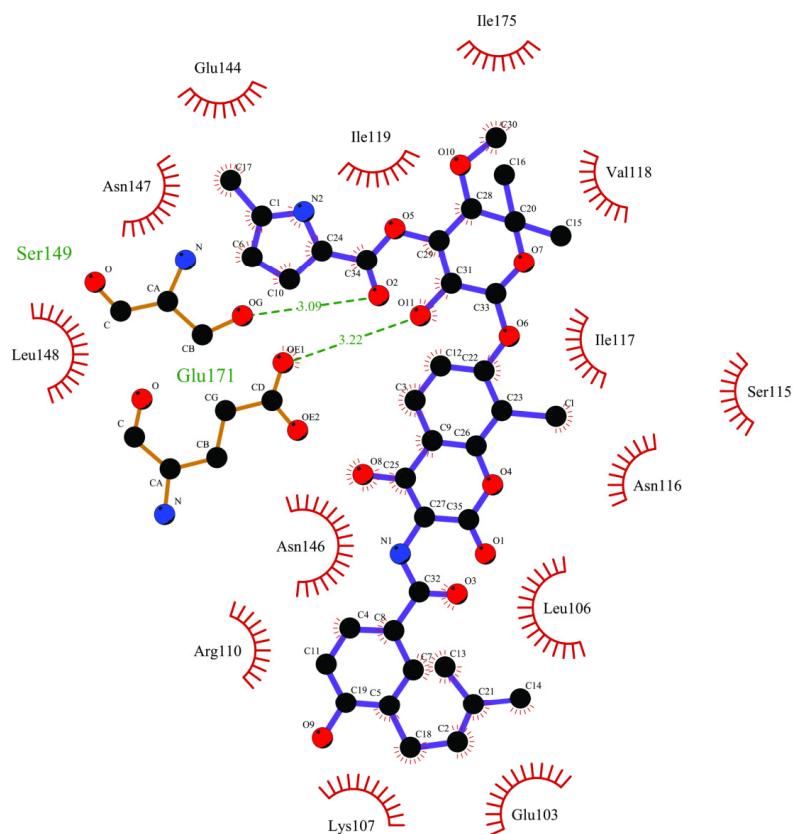

4OJK\_A

**S3.4 Fig. Ligand ZINC29590263 docked at site 2 of PDB entry 4OJK\_A.** The ligand and Rab11 side chains are shown in ball-and-stick representation. The ligand bonds are colored in purple. Hydrogen bonds are shown as green dotted lines. The Rab11 residues making nonbonded contacts with the ligand are shown as spoked arcs. The figure is generated using LigPlot+ .
